# Supplementary material
Source: publisher figshare collection journal article supplement (https://sage.figshare.com/articles/dataset/_/7503647)
Supplement: Supplementary file 1 [file 13899734]

**Supplementary Table 7: 12 patients NSN+.**

|           | age | T size | Grade | Histology | LVI | SN pN    | Nb NSN+ | ALND and AC | AC | Nb SN | Nb SN+ |
|-----------|-----|--------|-------|-----------|-----|----------|---------|-------------|----|-------|--------|
| <b>1</b>  | 53  | 38     | 2     | mucinous  | 1   | pN macro | 11      | before AC   | 1  | 3     | 1      |
| <b>2</b>  | 85  | 30     | 3     | mucinous  | 1   | pN macro | 8       |             | 0  | 3     | 3      |
| <b>3</b>  | 73  | 20     | 2     | tubular   | 0   | pN macro | 8       | before AC   | 1  | 2     | 1      |
| <b>4</b>  | 56  | 70     | 1     | tubular   | 0   | pN1mi    | 2       | before AC   | 1  | 1     | 1      |
| <b>5</b>  | 57  | 18     | 1     | tubular   | 0   | pN macro | 2       | before AC   | 1  | 1     | 1      |
| <b>6</b>  | 43  | 12     | 1     | tubular   | 0   | pN macro | 1       | before AC   | 1  | 1     | 1      |
| <b>7</b>  | 41  | 24     | 1     | mucinous  | 1   | pN0(i+)  | 1       | before AC   | 1  | 2     | 2      |
| <b>8</b>  | 70  | 20     | 2     | mucinous  | 0   | pN macro | 1       |             | 0  | 1     | 1      |
| <b>9</b>  | 61  | 35     | 1     | mucinous  | 0   | pN macro | 1       | before AC   | 1  | 3     | 1      |
| <b>10</b> | 58  | 25     | 1     | tubular   | 0   | pN macro | 1       | before AC   | 1  | 3     | 1      |
| <b>11</b> | 53  | 11     | 1     | tubular   | 0   | pN macro | 1       | before AC   | 1  | 4     | 2      |
| <b>12</b> | 60  | 8      | 1     | tubular   | 0   | pN1mi    | 1       | before AC   | 1  | 1     | 1      |

Legend: LVI: lympho vascular invasion AC: adjuvant chemotherapy

**Supplementary Table 8: OS and DFS**

|                        |                    | OS      |         | Log Rank | DFS     |         | Log Rank | CSOS    |         | Log Rank |
|------------------------|--------------------|---------|---------|----------|---------|---------|----------|---------|---------|----------|
|                        |                    | 5-years | 7-years | p        | 5-years | 7-years | p        | 5-years | 7-years | p        |
|                        | All patients       | 95.8    | 94      |          | 97.2    | 96.2    |          | 99.1    | 98.8    |          |
|                        | (patients at risk) | 391     | 159     |          | 373     | 147     |          | 391     | 160     |          |
| <b>histology</b>       | tubular            | 97.1    | 95      | 0.043    | 97.9    | 97.2    | 0.041    | 100     | 99.6    | 0.032    |
|                        | mucinous           | 92.3    | 91.2    |          | 95.2    | 93.6    |          | 96.7    | 96.7    |          |
| <b>age</b>             | <= 40              | 87.9    | 87.9    | <0.0001  | 90.7    | 90.7    | 0.654    | 87.9    | 87.9    | 0.012    |
|                        | 40.1 - 50          | 97.7    | 96.5    |          | 96.2    | 96.2    |          | 99      | 97.8    |          |
|                        | 50.1 - 74.9        | 96.6    | 94.8    |          | 97.8    | 96.5    |          | 99.5    | 99.5    |          |
|                        | >= 75              | 87.9    | 84.5    |          | 97.1    | 97.1    |          | 100     | 100     |          |
| <b>size</b>            | <= 5mm             | 97.2    | 95.1    | 0.011    | 96.4    | 96.4    | 0.026    | 97.9    | 97.9    | <0.0001  |
|                        | 5.1 - 10           | 97.2    | 94.1    |          | 97      | 97      |          | 99.3    | 99.3    |          |
|                        | 10.1 - 19.9        | 97.2    | 96.4    |          | 98.7    | 97.2    |          | 99.3    | 99.3    |          |
|                        | 20 - 50            | 90.7    | 88.8    |          | 98.2    | 95.4    |          | 99      | 99      |          |
|                        | > 50               | 83.9    | 83.9    |          | 80.7    | 80.7    |          | 83.9    | 83.9    |          |
| <b>grade</b>           | 1                  | 96.5    | 94.6    | 0.136    | 98.2    | 98.2    | <0.0001  | 99.8    | 99.5    | <0.0001  |
|                        | 2                  | 93.3    | 93.3    |          | 91.3    | 84      |          | 94.3    | 94.3    |          |
|                        | 3                  | 90      | 75      |          |         |         |          | 100     | 100     |          |
| <b>LVI</b>             | no                 | 96.7    | 94.9    | 0.001    | 98.7    | 97.6    | 0.374    | 99.6    | 99.3    | 0.143    |
|                        | yes                | 80.6    | 77.1    |          | 95.3    | 95.3    |          | 93.8    | 93.8    |          |
| <b>HR</b>              | positive           | 96.1    | 94.2    | 0.982    | 97.5    | 96.5    | 0.042    | 99.3    | 99      | 0.204    |
|                        | negative           | 88.9    | 88.9    |          | 88.2    | 88.2    |          | 88.9    | 88.9    |          |
| <b>pN final status</b> | pN0                | 96.6    | 94.5    | 0.057    | 97.4    | 96.2    | 0.502    | 99.5    | 99.2    | 0.013    |
|                        | pN0 i+             | 87.5    | 87.5    |          | 100     | 100     |          | 100     | 100     |          |
|                        | pN1 mi             | 97.3    | 97.3    |          | 96.1    | 96.1    |          | 100     | 100     |          |
|                        | pN1 macrometastase | 91.6    | 89.2    |          | 96.8    | 96.8    |          | 96.2    | 96.2    |          |

|  |                     |      |      |  |      |      |  |      |      |  |
|--|---------------------|------|------|--|------|------|--|------|------|--|
|  | 1 macrometastasis   | 91.2 | 91.2 |  | 96.2 | 96.2 |  | 96   | 96   |  |
|  | > 1 macrometastasis | 91.5 | 87.8 |  | 97.1 | 97.1 |  | 96.6 | 96.6 |  |

Legend: LVI: lympho vascular invasion, HR: hormonal receptors, OS: overall survival, DFS: disease free survival, CSOS: cancer specific overall survival.
